# Supplementary material
Source: PubMed Central journal article supplement (PMC8857056)

**A**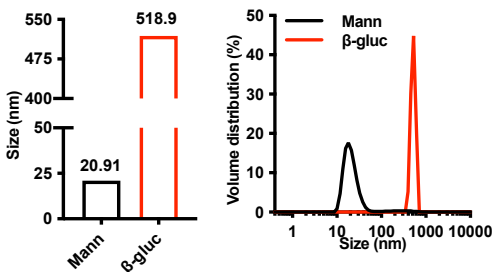**B**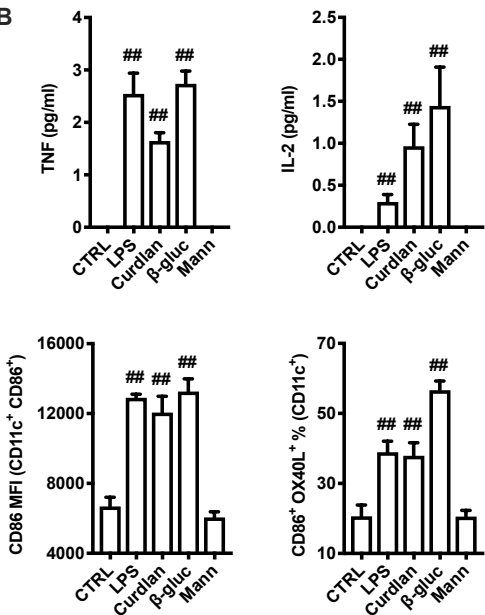**C**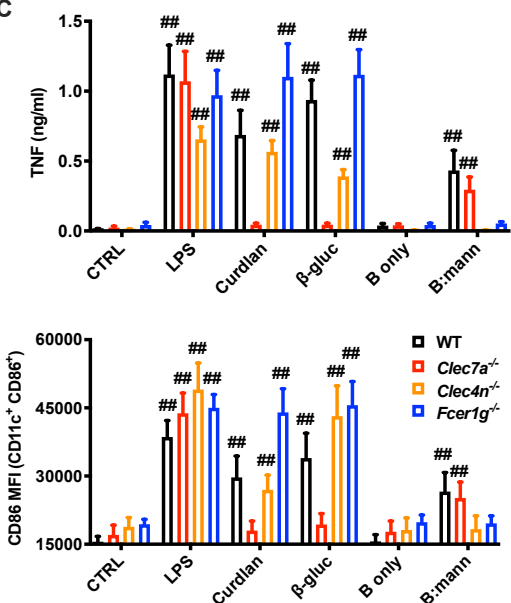**D**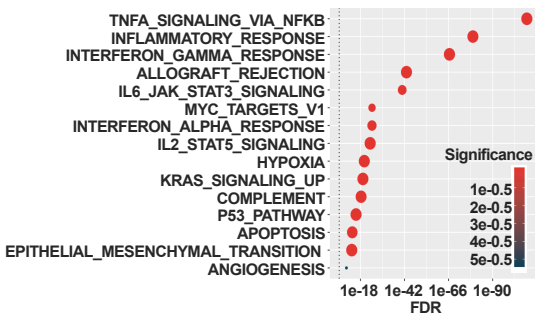**Figure S1**

Supplement: NIHMS1772871-supplement-Fig_S1.pdf [file NIHMS1772871-supplement-Fig_S1.pdf]

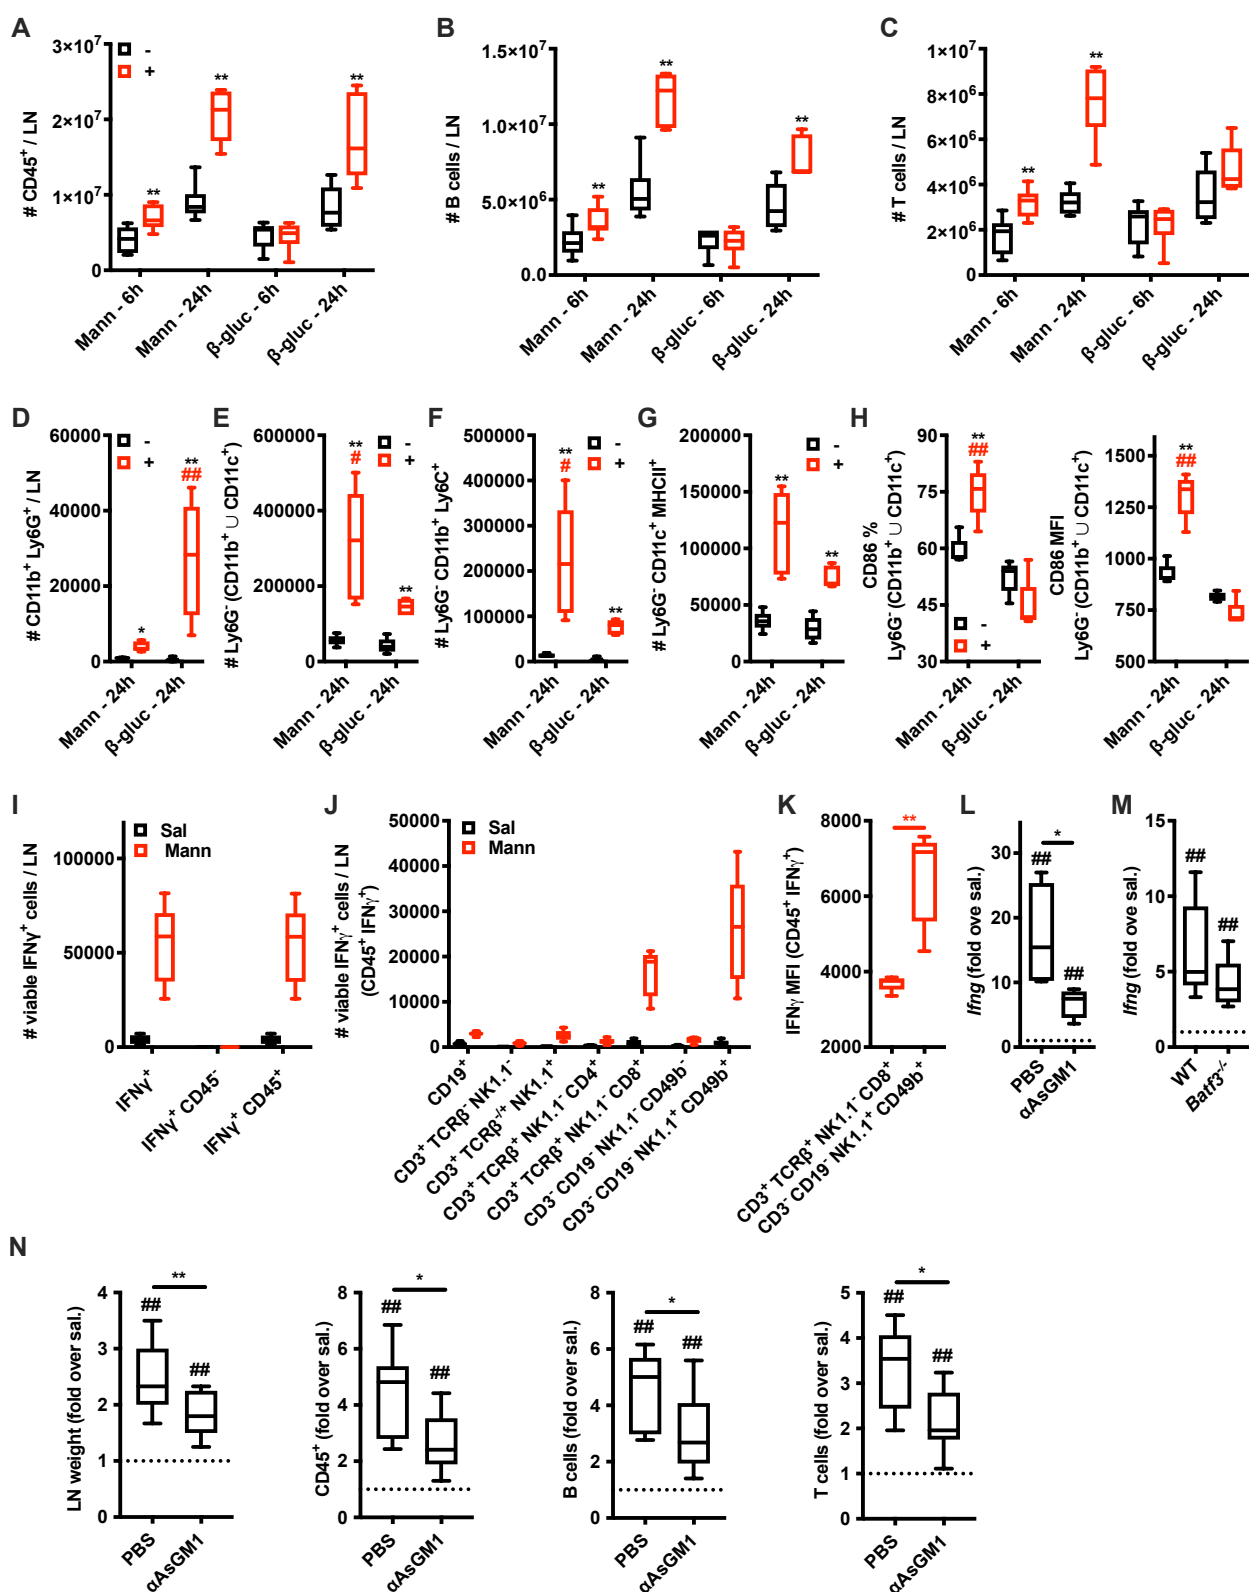

**Figure S2**

Supplement: NIHMS1772871-supplement-Fig_S2.pdf [file NIHMS1772871-supplement-Fig_S2.pdf]

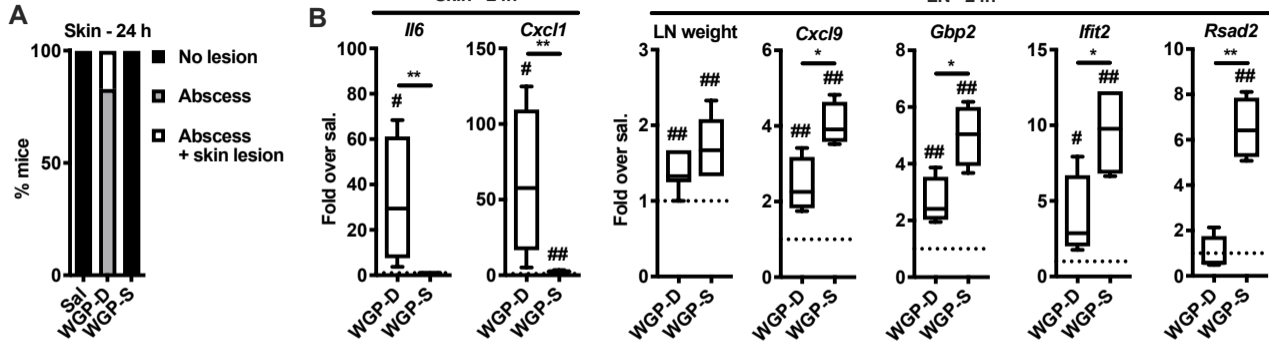

**Figure S3**

Supplement: NIHMS1772871-supplement-Fig_S3.pdf [file NIHMS1772871-supplement-Fig_S3.pdf]

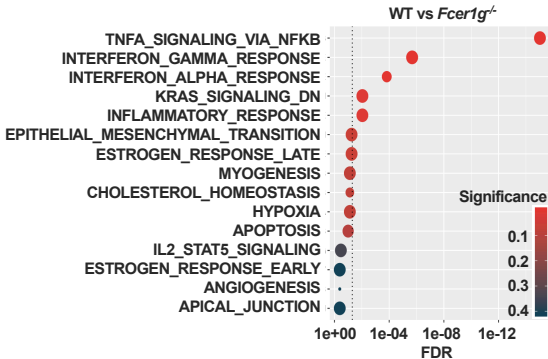

**Figure S4**

Supplement: NIHMS1772871-supplement-Fig_S4.pdf [file NIHMS1772871-supplement-Fig_S4.pdf]

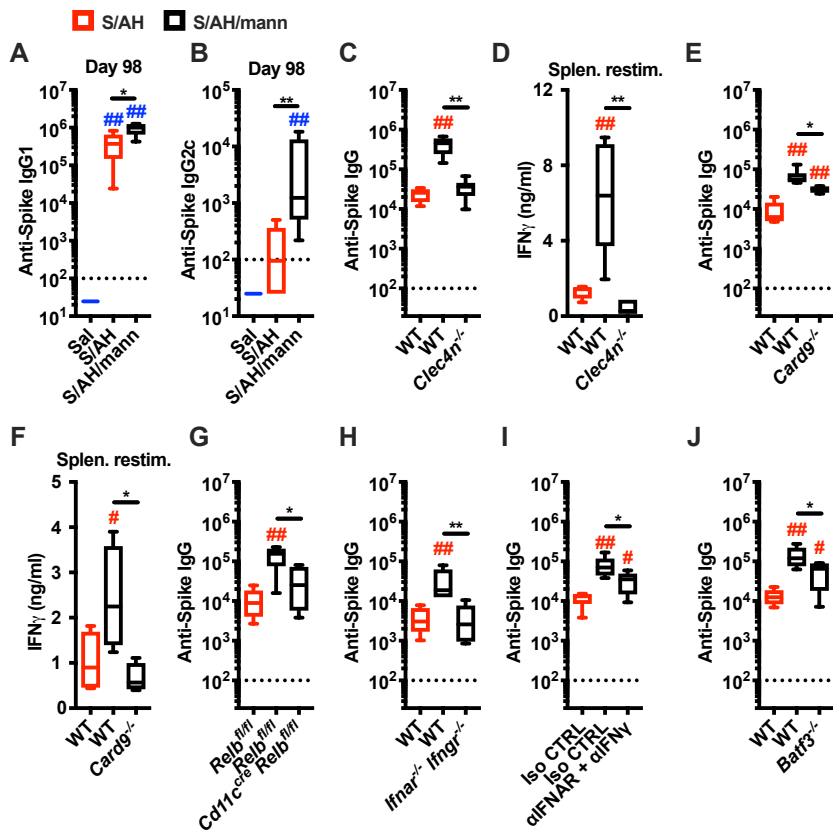

**Figure S6**

Supplement: NIHMS1772871-supplement-Fig_S6.pdf [file NIHMS1772871-supplement-Fig_S6.pdf]

**A** % hACE2/RBD inhib.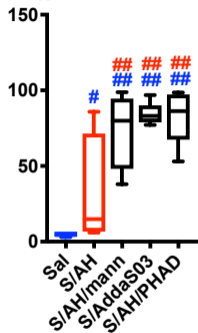**B** SARS-CoV-2 neut. titer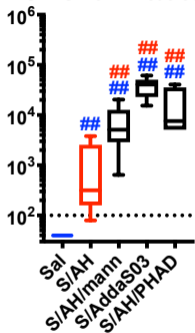**C**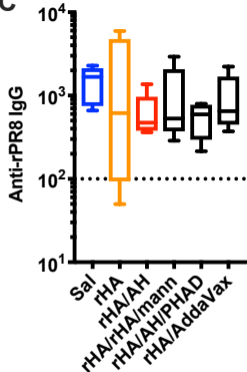**D**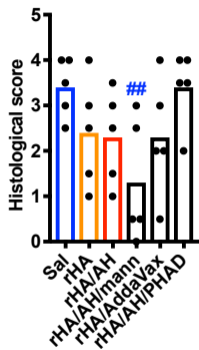**Figure S7**

Supplement: NIHMS1772871-supplement-Fig_S7.pdf [file NIHMS1772871-supplement-Fig_S7.pdf]
